# Supplementary material for: Mutations in the SmAPRR2 transcription factor suppressing chlorophyll pigmentation in the eggplant fruit peel are key drivers of a diversified colour palette
Source: Front Plant Sci. 2022 Oct 27;13:1025951. doi: 10.3389/fpls.2022.1025951 (PMC9647125; doi:10.3389/fpls.2022.1025951)
Supplement: Supplementary Table 1 — List of candidate genes for chlorophyll pigmentation in the eggplant fruit peel under the identified GWAS peaks on chromosomes 4 and 8. [file Table_1.xlsx]

## Sheet: GLK2_Chr4_3.23-6.35
Table S1. List of candidate genes for chlorophyll pigmentation in the eggplant fruit peel under the identified GWAS peaks on chromosomes 4 and 8.
Name	Description
SMEL_004g202290	Similar to At1g15680: Putative F-box/kelch-repeat protein At1g15680
SMEL_004g202300	Similar to RMA1H1: E3 ubiquitin-protein ligase RMA1H1
SMEL_004g202310	Similar to At3g15360: Thioredoxin M4, chloroplastic
SMEL_004g202320	Similar to KDSB: 3-deoxy-manno-octulosonate cytidylyltransferase, mitochondrial
SMEL_004g202330	Similar to URT1: UTP:RNA uridylyltransferase 1
SMEL_004g202340	Similar to UBC26: Probable ubiquitin-conjugating enzyme E2 26
SMEL_004g202350	Similar to COX17-1: Cytochrome c oxidase copper chaperone 1
SMEL_004g202360	Protein of unknown function
SMEL_004g202370	Similar to GLCAT14A: Beta-glucuronosyltransferase GlcAT14A
SMEL_004g202380	Similar to VIT_19s0014g02480: Probable bifunctional methylthioribulose-1-phosphate dehydratase/enolase-phosphatase E1 1
SMEL_004g202390	Similar to ENODL1: Early nodulin-like protein 1
SMEL_004g202400	Similar to DTX18: Protein DETOXIFICATION 18
SMEL_004g202410	Similar to DTX19: Protein DETOXIFICATION 19
SMEL_004g202420	Similar to ATHB-52: Homeobox-leucine zipper protein ATHB-52
SMEL_004g202430	Similar to At4g28440: Uncharacterized protein At4g28440
SMEL_004g202440	Similar to MORF8: Multiple organellar RNA editing factor 8, chloroplastic/mitochondrial
SMEL_004g202450	Similar to LIMYB: L10-interacting MYB domain-containing protein
SMEL_004g202460	Similar to B3GALT14: Probable beta-1,3-galactosyltransferase 14
SMEL_004g202470	Similar to B3GALT14: Probable beta-1,3-galactosyltransferase 14
SMEL_004g202480	Similar to TTL1: TPR repeat-containing thioredoxin TTL1
SMEL_004g202490	Similar to UBC36: Ubiquitin-conjugating enzyme E2 36
SMEL_004g202500	Similar to LAT52: Anther-specific protein LAT52
SMEL_004g202510	Similar to HSR4: Protein HYPER-SENSITIVITY-RELATED 4
SMEL_004g202520	Similar to PPC: Phosphoenolpyruvate carboxylase
SMEL_004g202530	Similar to LSH10: Protein LIGHT-DEPENDENT SHORT HYPOCOTYLS 10
SMEL_004g202540	Similar to HEME1: Uroporphyrinogen decarboxylase 1, chloroplastic
SMEL_004g202550	Similar to Peptide-N4-(N-acetyl-beta-glucosaminyl)asparagine amidase A
SMEL_004g202560	Protein of unknown function
SMEL_004g202570	Similar to At1g65750: Putative ribonuclease H protein At1g65750
SMEL_004g202580	Protein of unknown function
SMEL_004g202590	Similar to MBF1A: Multiprotein-bridging factor 1a
SMEL_004g202600	Similar to DTX19: Protein DETOXIFICATION 19
SMEL_004g202610	Protein of unknown function
SMEL_004g202620	Protein of unknown function
SMEL_004g202630	Similar to GGH2: Gamma-glutamyl hydrolase 2
SMEL_004g202640	Protein of unknown function
SMEL_004g202650	Protein of unknown function
SMEL_004g202660	Similar to TBL42: Protein trichome birefringence-like 42
SMEL_004g202670	Similar to Os05g0239150: Zinc finger BED domain-containing protein RICESLEEPER 1
SMEL_004g202680	Similar to RHM1: Trifunctional UDP-glucose 4,6-dehydratase/UDP-4-keto-6-deoxy-D-glucose 3,5-epimerase/UDP-4-keto-L-rhamnose-reductase RHM1
SMEL_004g202690	Protein of unknown function
SMEL_004g202700	Similar to MPK19: Mitogen-activated protein kinase 19
SMEL_004g202710	Similar to GLC1: Glucan endo-1,3-beta-glucosidase
SMEL_004g202720	Similar to At3g14580: Pentatricopeptide repeat-containing protein At3g14580, mitochondrial
SMEL_004g202730	Protein of unknown function
SMEL_004g202740	Protein of unknown function
SMEL_004g202750	Similar to RH10: DEAD-box ATP-dependent RNA helicase 10
SMEL_004g202760	Similar to GA2OX1: Gibberellin 2-beta-dioxygenase 1
SMEL_004g202770	Similar to VQ10: VQ motif-containing protein 10
SMEL_004g202780	Similar to CID9: Polyadenylate-binding protein-interacting protein 9
SMEL_004g202790	Similar to GLO1: (S)-2-hydroxy-acid oxidase GLO1
SMEL_004g202800	Similar to At3g14410: Probable sugar phosphate/phosphate translocator At3g14410
SMEL_004g202810	Similar to PARC: Probable glutathione S-transferase parC
SMEL_004g202820	Similar to Probable glutathione S-transferase
SMEL_004g202830	Protein of unknown function
SMEL_004g202840	Similar to Probable glutathione S-transferase
SMEL_004g202850	Similar to PARC: Probable glutathione S-transferase parC
SMEL_004g202860	Similar to Probable glutathione S-transferase
SMEL_004g202870	Similar to NRPB12: DNA-directed RNA polymerases II, IV and V subunit 12
SMEL_004g202880	Similar to POPTRDRAFT_834139: CASP-like protein 2A1
SMEL_004g202890	Protein of unknown function
SMEL_004g202900	Similar to UVR8: Ultraviolet-B receptor UVR8
SMEL_004g202910	Similar to CAB8: Chlorophyll a-b binding protein 8, chloroplastic
SMEL_004g202920	Similar to RABB1C: Ras-related protein RABB1c
SMEL_004g202930	Similar to At4g10955: GDSL esterase/lipase At4g10955
SMEL_004g202940	Protein of unknown function
SMEL_004g202950	Protein of unknown function
SMEL_004g202960	Protein of unknown function
SMEL_004g202970	Protein of unknown function
SMEL_004g202980	Protein of unknown function
SMEL_004g202990	Similar to PRS4: Ribose-phosphate pyrophosphokinase 4
SMEL_004g203000	Similar to ML2: Protein MEI2-like 2
SMEL_004g203010	Similar to PMD2: Peroxisomal and mitochondrial division factor 2
SMEL_004g203020	Similar to PDF1: Protodermal factor 1
SMEL_004g203030	Protein of unknown function
SMEL_004g203040	Protein of unknown function
SMEL_004g203050	Similar to Os05g0239150: Zinc finger BED domain-containing protein RICESLEEPER 1
SMEL_004g203060	Similar to HVA22F: HVA22-like protein f
SMEL_004g203070	Similar to RLP29: Receptor like protein 29
SMEL_004g203080	Similar to GATA: Glutamyl-tRNA(Gln) amidotransferase subunit A, chloroplastic/mitochondrial
SMEL_004g203090	Similar to At2g25940: Vacuolar-processing enzyme alpha-isozyme
SMEL_004g203100	Protein of unknown function
SMEL_004g203110	Protein of unknown function
SMEL_004g203120	Protein of unknown function
SMEL_004g203130	Similar to At5g53970: Probable aminotransferase TAT2
SMEL_004g203140	Similar to UGT79B9: UDP-glycosyltransferase 79B9
SMEL_004g203150	Protein of unknown function
SMEL_004g203160	Similar to SHH2: Protein SAWADEE HOMEODOMAIN HOMOLOG 2
SMEL_004g203170	Similar to ZFP1: Probable E3 ubiquitin-protein ligase ZFP1
SMEL_004g203180	Similar to API5: Apoptosis inhibitor 5-like protein API5
SMEL_004g203190	Protein of unknown function
SMEL_004g203200	Protein of unknown function
SMEL_004g203210	Protein of unknown function
SMEL_004g203220	Protein of unknown function
SMEL_004g203230	Protein of unknown function
SMEL_004g203240	Similar to Cytochrome P450 CYP72A219
SMEL_004g203250	Similar to Cytochrome P450 CYP72A219
SMEL_004g203260	Similar to Cytochrome P450 CYP72A219
SMEL_004g203270	Similar to PCMP-H40: Pentatricopeptide repeat-containing protein At1g11290, chloroplastic
SMEL_004g203280	Protein of unknown function
SMEL_004g203290	Similar to CYP72A225: Cytochrome P450 72A225
SMEL_004g203300	Similar to Cytochrome P450 CYP72A219
SMEL_004g203310	Similar to Cytochrome P450 CYP72A219
SMEL_004g203320	Similar to CYP72A225: Cytochrome P450 72A225
SMEL_004g203330	Similar to PCMP-E91: Pentatricopeptide repeat-containing protein At3g16610
SMEL_004g203340	Similar to TPS7: Probable alpha,alpha-trehalose-phosphate synthase [UDP-forming] 7
SMEL_004g203350	Similar to AOS3: Allene oxide synthase 3
SMEL_004g203360	Similar to AOS3: Allene oxide synthase 3
SMEL_004g203370	Similar to AOS3: Allene oxide synthase 3
SMEL_004g203380	Similar to AOS3: Allene oxide synthase 3
SMEL_004g203390	Similar to RPL11B: 60S ribosomal protein L11-2
SMEL_004g203400	Similar to PCO4: Plant cysteine oxidase 4
SMEL_004g203410	Similar to LSH10: Protein LIGHT-DEPENDENT SHORT HYPOCOTYLS 10
SMEL_004g203420	Similar to PAB1: Proteasome subunit alpha type-2-A
SMEL_004g203430	Similar to TFT8: 14-3-3 protein 8
SMEL_004g203440	Protein of unknown function
SMEL_004g203450	Similar to TBL39: Protein trichome birefringence-like 39
SMEL_004g203460	Similar to SBP65: Seed biotin-containing protein SBP65
SMEL_004g203470	Similar to TAX1: Signaling peptide TAXIMIN 1
SMEL_004g203480	Protein of unknown function
SMEL_004g203490	Protein of unknown function
SMEL_004g203500	Similar to GTE4: Transcription factor GTE4
SMEL_004g203510	Similar to OST3B: Probable dolichyl-diphosphooligosaccharide--protein glycosyltransferase subunit 3B
SMEL_004g203520	Similar to Os01g0276800: Glucosidase 2 subunit beta
SMEL_004g203530	Similar to ACX3: Acyl-coenzyme A oxidase 3, peroxisomal
SMEL_004g203540	Similar to OMT3: Probable O-methyltransferase 3
SMEL_004g203550	Similar to PHB1: Prohibitin-1, mitochondrial
SMEL_004g203560	Similar to GRXC9: Glutaredoxin-C9
SMEL_004g203570	Similar to GLK2: Transcription activator GLK2
SMEL_004g203580	Similar to RPN1B: 26S proteasome non-ATPase regulatory subunit 2 homolog B
SMEL_004g203590	Similar to SUR1: S-alkyl-thiohydroximate lyase SUR1
SMEL_004g203600	Protein of unknown function
SMEL_004g203610	Protein of unknown function
SMEL_004g203620	Similar to LTP13: Non-specific lipid-transfer protein 13
SMEL_004g203630	Similar to TPX2: Protein TPX2
SMEL_004g203640	Similar to AAC3: ADP,ATP carrier protein 3, mitochondrial
SMEL_004g203650	Similar to R1B-14: Putative late blight resistance protein homolog R1B-14
SMEL_004g203660	Similar to R1B-17: Putative late blight resistance protein homolog R1B-17
SMEL_004g203670	Similar to R1B-14: Putative late blight resistance protein homolog R1B-14
SMEL_004g203680	Similar to BHLH162: Transcription factor bHLH162
SMEL_004g203690	Similar to WSD1: O-acyltransferase WSD1
SMEL_004g203700	Similar to BHLH162: Transcription factor bHLH162
SMEL_004g203710	Protein of unknown function
SMEL_004g203720	Similar to BHLH162: Transcription factor bHLH162
SMEL_004g203730	Similar to At1g09600: Probable serine/threonine-protein kinase At1g09600
SMEL_004g203740	Similar to MAN2: Mannan endo-1,4-beta-mannosidase 2
SMEL_004g203750	Protein of unknown function
SMEL_004g203760	Similar to MLP146: Major latex protein 146
SMEL_004g203770	Protein of unknown function
SMEL_004g203780	Protein of unknown function
SMEL_004g203790	Similar to LLG2: GPI-anchored protein LLG2
SMEL_004g203800	Similar to Thioredoxin M-type, chloroplastic
SMEL_004g203810	Similar to RMA1H1: E3 ubiquitin-protein ligase RMA1H1
SMEL_004g203820	Protein of unknown function
SMEL_004g203830	Protein of unknown function
SMEL_004g203840	Similar to EXPB3: Expansin-B3
SMEL_004g203850	Similar to At3g06240: F-box/kelch-repeat protein At3g06240
SMEL_004g203860	Similar to CEL3: Endoglucanase 9
SMEL_004g203870	Similar to At3g06240: F-box/kelch-repeat protein At3g06240
SMEL_004g203880	Similar to At3g23880: F-box/kelch-repeat protein At3g23880
SMEL_004g203890	Similar to GCL2: LanC-like protein GCL2
SMEL_004g203900	Similar to MES11: Putative methylesterase 11, chloroplastic
SMEL_004g203910	Protein of unknown function
SMEL_004g203920	Protein of unknown function
SMEL_004g203930	Similar to PPC6-6: Probable protein phosphatase 2C 1
SMEL_004g203940	Protein of unknown function
SMEL_004g203950	Similar to At1g03560: Pentatricopeptide repeat-containing protein At1g03560, mitochondrial
SMEL_004g203960	Protein of unknown function
SMEL_004g203970	Similar to GH3.10: Indole-3-acetic acid-amido synthetase GH3.10
SMEL_004g203980	Protein of unknown function
SMEL_004g203990	Protein of unknown function
SMEL_004g204000	Similar to SCAMP2: Secretory carrier-associated membrane protein 2
SMEL_004g204010	Similar to RUS6: Protein root UVB sensitive 6
SMEL_004g204020	Similar to PCMP-E4: Pentatricopeptide repeat-containing protein At1g03540
SMEL_004g204030	Similar to SYP124: Syntaxin-124
SMEL_004g204040	Similar to At3g06240: F-box/kelch-repeat protein At3g06240
SMEL_004g204050	Similar to PCMP-E3: Putative pentatricopeptide repeat-containing protein At1g03510
SMEL_004g204060	Protein of unknown function
SMEL_004g204070	Similar to At3g07870: F-box protein At3g07870

## Sheet: APRR2_Chr8_103.22-104.98
Table S1. List of candidate genes for chlorophyll pigmentation in the eggplant fruit peel under the identified GWAS peaks on chromosomes 4 and 8.
Name	Description
SMEL_008g314920	Similar to At4g17830: Acetylornithine deacetylase
SMEL_008g314930	Similar to At4g17830: Acetylornithine deacetylase
SMEL_008g314940	Similar to ZFP10: Zinc finger protein 10
SMEL_008g314950	Similar to AHL21: AT-hook motif nuclear-localized protein 21
SMEL_008g314960	Protein of unknown function
SMEL_008g314970	Similar to AHL13: AT-hook motif nuclear-localized protein 13
SMEL_008g314980	Protein of unknown function
SMEL_008g314990	Similar to LEA6: Late embryogenesis abundant protein 6
SMEL_008g315000	Similar to GmSGT2: Soyasapogenol B glucuronide galactosyltransferase
SMEL_008g315010	Protein of unknown function
SMEL_008g315020	Similar to FDC2: Ferredoxin C 2, chloroplastic
SMEL_008g315030	Similar to LOL1: Protein LOL1
SMEL_008g315040	Similar to GmSGT2: Soyasapogenol B glucuronide galactosyltransferase
SMEL_008g315050	Similar to GmSGT2: Soyasapogenol B glucuronide galactosyltransferase
SMEL_008g315060	Similar to CDC48: Cell division cycle protein 48 homolog
SMEL_008g315070	Similar to EYA: Eyes absent homolog
SMEL_008g315080	Similar to ABCG34: ABC transporter G family member 34
SMEL_008g315090	Similar to MIP1: MND1-interacting protein 1
SMEL_008g315100	Similar to NAC071: NAC domain-containing protein 71
SMEL_008g315110	Similar to PLL1: Protein phosphatase 2C 29
SMEL_008g315120	Similar to CYP708A2: Cytochrome P450 708A2
SMEL_008g315130	Similar to CYP708A2: Cytochrome P450 708A2
SMEL_008g315140	Similar to FLZ2: FCS-Like Zinc finger 2
SMEL_008g315150	Similar to RTNLB22: Reticulon-like protein B22
SMEL_008g315160	Similar to BRG2: Probable BOI-related E3 ubiquitin-protein ligase 2
SMEL_008g315170	Protein of unknown function
SMEL_008g315180	Similar to Lon protease homolog 2, peroxisomal
SMEL_008g315190	Protein of unknown function
SMEL_008g315200	Similar to UPF1: Regulator of nonsense transcripts 1 homolog
SMEL_008g315210	Similar to At1g32710: Putative cytochrome c oxidase subunit 6b-like
SMEL_008g315220	Similar to Putative invertase inhibitor
SMEL_008g315230	Similar to NMAT2: Nuclear intron maturase 2, mitochondrial
SMEL_008g315240	Similar to PUP21: Purine permease 21
SMEL_008g315250	Similar to PUP21: Purine permease 21
SMEL_008g315260	Similar to DRP1E: Dynamin-related protein 1E
SMEL_008g315270	Similar to SGPP: Haloacid dehalogenase-like hydrolase domain-containing protein Sgpp
SMEL_008g315280	Similar to EXLB1: Expansin-like B1
SMEL_008g315290	Similar to PCMP-E27: Pentatricopeptide repeat-containing protein At3g29230
SMEL_008g315300	Similar to SUA: SUPPRESSOR OF ABI3-5
SMEL_008g315310	Similar to MAMYB: Transcription factor MAMYB
SMEL_008g315320	Protein of unknown function
SMEL_008g315330	Similar to DRT101: Phosphoacetylglucosamine mutase
SMEL_008g315340	Similar to At1g32410: Vacuolar protein sorting-associated protein 55 homolog
SMEL_008g315350	Protein of unknown function
SMEL_008g315360	Similar to At4g18030: Probable methyltransferase PMT14
SMEL_008g315370	Similar to APRR2: Two-component response regulator-like APRR2
SMEL_008g315380	Similar to TOM2A: Tobamovirus multiplication protein 2A
SMEL_008g315390	Similar to IP5P2: Type I inositol polyphosphate 5-phosphatase 2
SMEL_008g315400	Similar to PRS2: Ribose-phosphate pyrophosphokinase 2, chloroplastic
SMEL_008g315410	Similar to Pyruvate kinase isozyme G, chloroplastic
SMEL_008g315420	Similar to NPF7.3: Protein NRT1/ PTR FAMILY 7.3
SMEL_008g315430	Similar to CYP708A2: Cytochrome P450 708A2
SMEL_008g315440	Similar to CYP708A2: Cytochrome P450 708A2
SMEL_008g315450	Similar to DIM: Delta(24)-sterol reductase
SMEL_008g315460	Similar to AOP1.2: Probable 2-oxoglutarate-dependent dioxygenase AOP1.2
SMEL_008g315470	Similar to TIP1-3: Aquaporin TIP1-3
SMEL_008g315480	Protein of unknown function
SMEL_008g315490	Similar to IDM1: Increased DNA methylation 1
SMEL_008g315500	Protein of unknown function
SMEL_008g315510	Protein of unknown function
SMEL_008g315520	Similar to EMB2217: Pentatricopeptide repeat-containing protein At1g79490, mitochondrial
SMEL_008g315530	Protein of unknown function
SMEL_008g315540	Similar to UCH3: Ubiquitin carboxyl-terminal hydrolase 3
SMEL_008g315550	Similar to At4g16800: Probable enoyl-CoA hydratase 2, mitochondrial
SMEL_008g315560	Similar to At4g18375: KH domain-containing protein At4g18375
SMEL_008g315570	Similar to At5g15280: Pentatricopeptide repeat-containing protein At5g15280, mitochondrial
SMEL_008g315580	Protein of unknown function
SMEL_008g315590	Similar to TSC10A: 3-dehydrosphinganine reductase TSC10A
SMEL_008g315600	Similar to GA2OX8: Gibberellin 2-beta-dioxygenase 8
SMEL_008g315610	Similar to IDM1: Increased DNA methylation 1
SMEL_008g315620	Similar to At1g31830: Probable polyamine transporter At1g31830
SMEL_008g315630	Similar to At4g16820: Phospholipase A1-Ibeta2, chloroplastic
SMEL_008g315640	Similar to DYW10: Pentatricopeptide repeat-containing protein At4g16835, mitochondrial
SMEL_008g315650	Similar to YPTM2: GTP-binding protein YPTM2
SMEL_008g315660	Protein of unknown function
SMEL_008g315670	Similar to MO3: Monooxygenase 3
SMEL_008g315680	Similar to CER26L: Protein ECERIFERUM 26-like
SMEL_008g315690	Protein of unknown function
SMEL_008g315700	Similar to RPL19: 50S ribosomal protein L19, chloroplastic
SMEL_008g315710	Protein of unknown function
SMEL_008g315720	Similar to RAD5B: DNA repair protein RAD5B
SMEL_008g315730	Similar to At1g35710: Probable leucine-rich repeat receptor-like protein kinase At1g35710
SMEL_008g315740	Protein of unknown function
SMEL_008g315750	Similar to EXLB1: Expansin-like B1
SMEL_008g315760	Similar to EXLB1: Expansin-like B1
SMEL_008g315770	Similar to EXLB1: Expansin-like B1
SMEL_008g315780	Similar to EXLB1: Expansin-like B1
SMEL_008g315790	Similar to CLPR4: ATP-dependent Clp protease proteolytic subunit-related protein 4, chloroplastic
SMEL_008g315800	Similar to LIL3.1: Light-harvesting complex-like protein 3 isotype 1, chloroplastic
SMEL_008g315810	Protein of unknown function
SMEL_008g315820	Similar to SBT2.6: Subtilisin-like protease SBT2.6
